# Supplementary material for: Toward Personalized Medicine: Using Cardiomyocytes Differentiated From Urine-Derived Pluripotent Stem Cells to Recapitulate Electrophysiological Characteristics of Type 2 Long QT Syndrome
Source: PubMed Central journal article supplement — J Am Heart Assoc. 2015 Sep 1;4(9):e002159. doi: 10.1161/JAHA.115.002159 (PMC4599503; doi:10.1161/jaha.115.002159), 2015-09-01
Supplement: jah30004-e002159-sd1.pdf [file jah30004-e002159-sd1.pdf]

## Supplemental data

Jouni et al.: Towards Personalized Medicine:

### Using Cardiomyocytes Differentiated From Urine-Derived Pluripotent Stem Cells to Recapitulate Electrophysiological Characteristics of Type 2 Long QT Syndrome

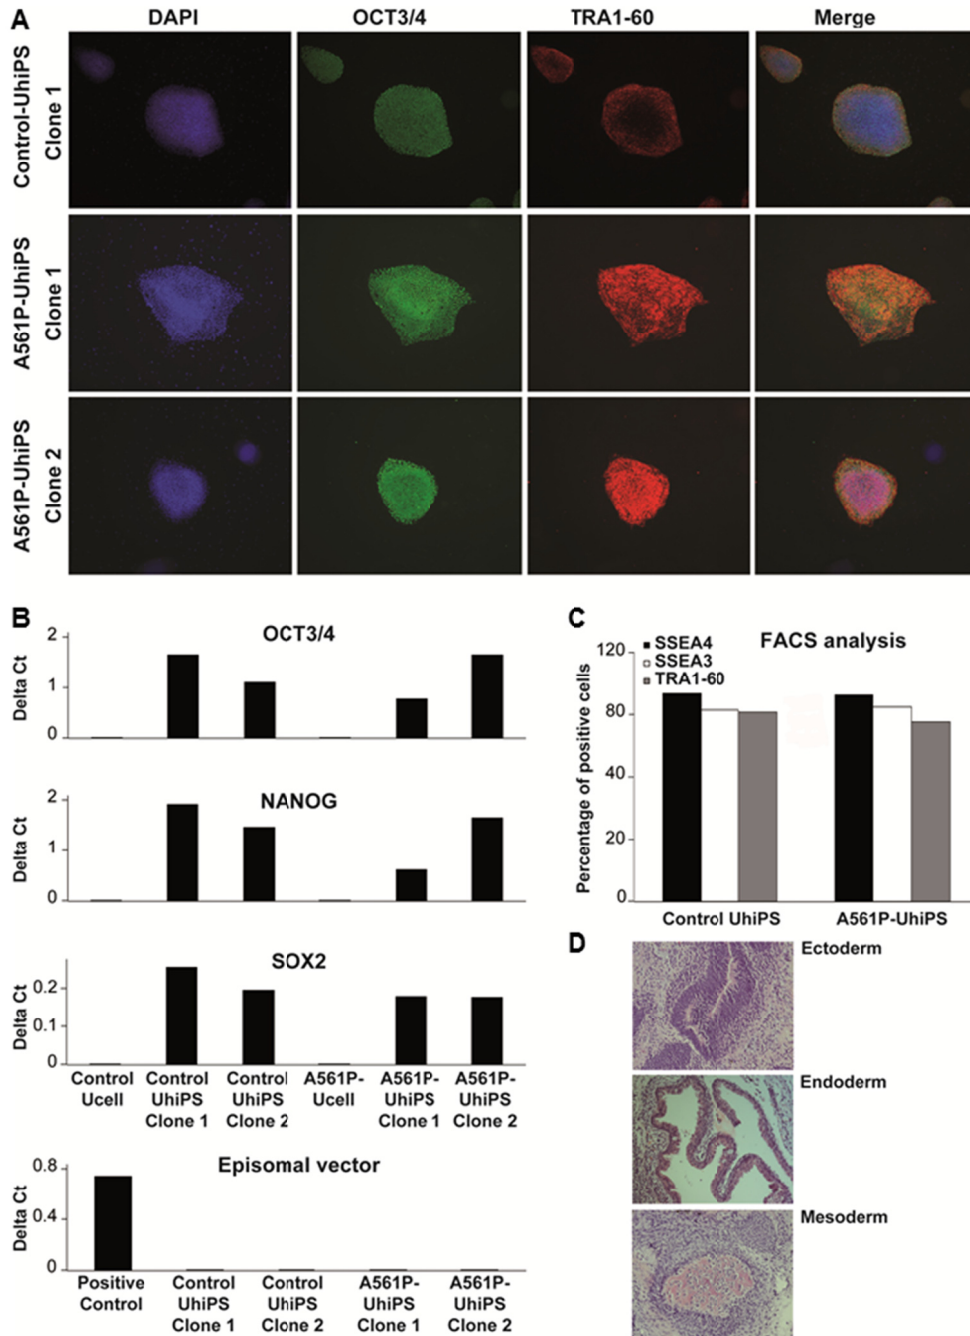

**Supplemental Figure 1: Characterization of hiPS cells from urine samples (UhiPS).** (A) Endogenous pluripotent stem cell marker (OCT3/4 and TRA1-60) visualization by immunofluorescence staining of one Control UhiPS clones and two A561P-UhiPS clones. (B) Expression level of additional endogenous pluripotent stem cell marker (*OCT3/4*, *NANOG* and *SOX2*) genes by qRT-PCR in control and A561P-UhiPS cells as compared to their corresponding urine cells, and expression level of the episomal vector in the same hiPS clones, at passage 10. (C) Percentage of control and A561P-UhiPS cells expressing the pluripotency genes SSEA4, SSEA3 and TRA1-60 measured by flow cytometry. (D) Teratoma formation following injection of undifferentiated UhiPS cells in NOD/SCID mice. The presence of neural tissue (ectoderm, top), intestinal epithelium (endoderm, middle) and immature bone tissue and cartilage (mesoderm, bottom) is shown.

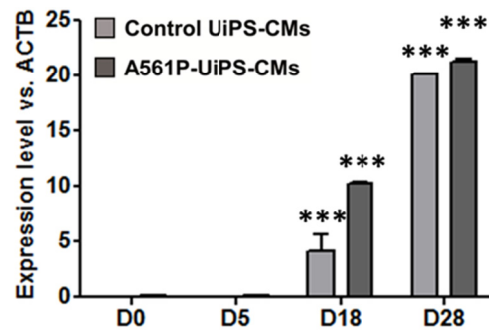

**Supplemental Figure 2: Analysis of hERG gene expression.** hERG encoding gene expression analysis, during cardiac differentiation (at day 0, 5, 18 and 28) of control UhiPS and of A561P-UhiPS derived cardiomyocytes, evaluated by RT-PCR. \*\*\*  $P < 0.001$  versus D0, no difference observed between control and mutated cells at each time-point.

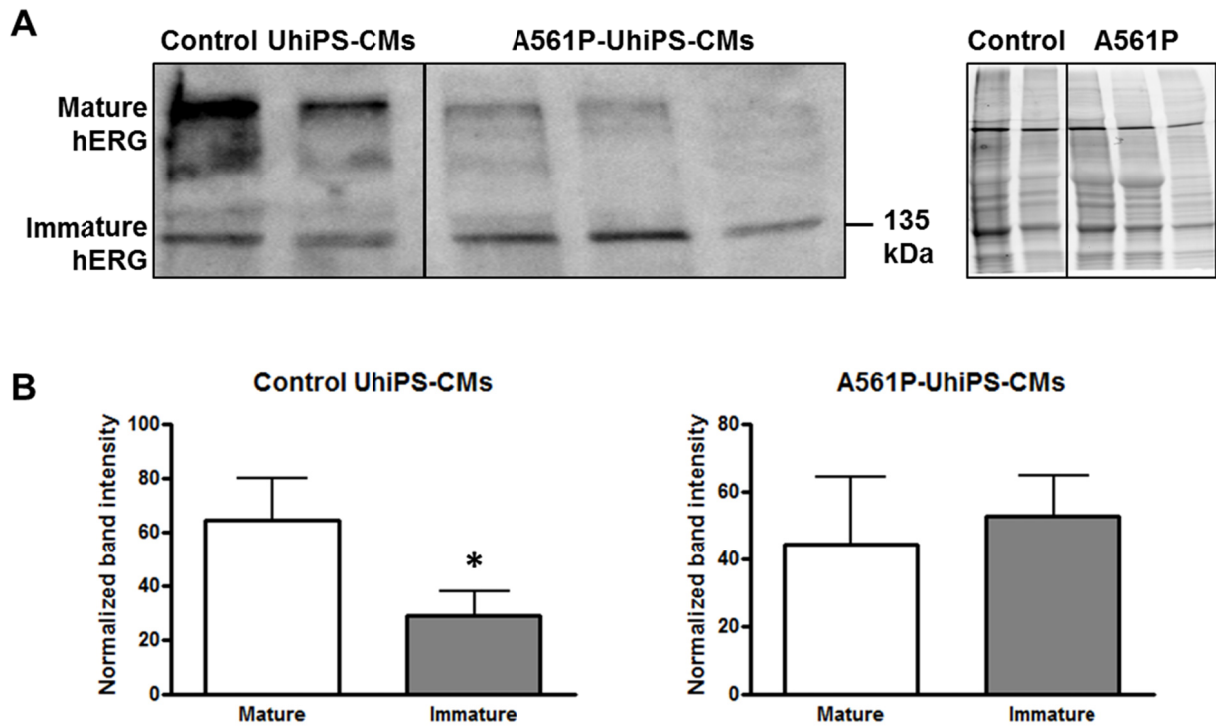

**Supplemental Figure 3: Analysis of hERG protein expression.** (A) Left: Western blot analysis of hERG protein expression in control UhiPS-CMs and A561P-UhiPS-CMs (same blot). Two hERG specific bands were revealed (mature and immature subunits). Right: Stain-free expression served as internal control of gel loading. (B) Normalized intensity quantification of mature and immature bands in control UhiPS-CMs (n=3) and A561P-UhiPS-CMs (n=4).

## Supplemental Tables

**Supplemental Table 1. TaqMan probes and SYBR Green primers.** Applied Biosystems references and gene names are listed.

| <b>TaqMan Probes</b> |                  |
|----------------------|------------------|
| <b>Gene</b>          | <b>Reference</b> |
| <b>ACTB</b>          | Hs99999903_m1    |
| <b>SOX2</b>          | Hs01053049_s1    |
| <b>NANOG</b>         | Hs02387400_g1    |
| <b>POU5F1</b>        | Hs04260367_g1    |
| <b>NKX2-5</b>        | Hs00231763-m1    |
| <b>GJA1</b>          | Hs00748445_s1    |
| <b>GJA5</b>          | Hs00270952_s1    |
| <b>RYR2</b>          | Hs00892883_m1    |
| <b>KCNJ2</b>         | Hs00265315_m1    |
| <b>KCNQ1</b>         | Hs00923522-m1    |
| <b>KCNH2</b>         | Hs04234270-g1    |
| <b>KCND3</b>         | Hs00542597_m1    |
| <b>CACNA1C</b>       | Hs00167681_m1    |
| <b>CACNA1G</b>       | Hs00367969_m1    |
| <b>SCN5A</b>         | Hs00165693_m1    |

| <b>Episomal detection primers</b> |                      |
|-----------------------------------|----------------------|
| <b>Orientation</b>                | <b>Sequence</b>      |
| <b>Forward</b>                    | GGCTCTCCCATGCATTCAAA |
| <b>Reverse</b>                    | GGCCCTCACATTGCCAAA   |

**Supplemental Table 2. Quantitative parameters used for classification of action potentials obtained from patch-clamp experiments on control cells.**

| APs (n=41)              | APD <sub>90</sub> (ms) | Amplitude (mV) | dV/dt <sub>max</sub> (V/s) | MDP (mV)  | Peak to peak duration (s) |
|-------------------------|------------------------|----------------|----------------------------|-----------|---------------------------|
| Nodal-like (n=5)        | 103.1±14.9             | 73.3±4.2       | 4.9±0.5                    | -49.6±4.7 | 0.4±0.1                   |
| Atrial-like (n=19)      | 185.8±15.8             | 81.8±1.9       | 6.9±0.3                    | -51.2±1.4 | 0.7±0.07                  |
| Ventricular-like (n=17) | 444.4±54.3             | 102.9±1.8      | 20.3±3.6                   | -56.2±1.7 | 0.8±0.1                   |
